# Supplementary material
Source: PubMed Central journal article supplement (PMC9433838)
Supplement: deac154_supplementary_table_si.pdf [file deac154_supplementary_table_si.pdf]

**Supplementary Table S1** Diagnostic codes for exposure, covariates and outcomes.

|                                    | International Classification of Diseases 9th and 10th revisions                                                                                                                                                              |
|------------------------------------|------------------------------------------------------------------------------------------------------------------------------------------------------------------------------------------------------------------------------|
| Polycystic ovary syndrome          | 256.4 (ICD-9); E28.2 (ICD-10)                                                                                                                                                                                                |
| ART                                | Z31.2, Z37.001, Z37.901, Z37.911, Z38.001, Z38.011, Z38.101, Z38.201                                                                                                                                                         |
| Maternal comorbidity               | E10-E14, E66, E78, F70-F98, I10-I15, O10, O24.5-O24.7, D69.0, H10.1, H10.4, J30.1-J30.4, J45, J67, L20, L23, L50.0, T78.0, T78.2-T78.4, T80.5, T88.6, T88.7, Z88, Z91.0                                                      |
| Substance use disorder             | F10-F19, K29.2, K70, K85.2, K86.0, K86.9, O35.4, O35.5, R78.0-R78.5, T40, T51.0, T65.2, X42, X45, X62, X65, Y12, Y15, Z50.2, Z50.8, Z58.7, Z71.4-Z71.6, Z72.0-Z722, Z86.40-Z86.42, Z86.48                                    |
| Childhood morbidity                |                                                                                                                                                                                                                              |
| Infection                          | A00-A99, B00-B99, G00-G05, H65-H67, I00, I01, I30.0, I30.1, I30.8, I30.9, I32.0, I32.1, I33.0, I33.9, I38, I39, I40.0, I41.0, I41.1, J00-J06, J09-J22, L00-L08, M00, M01, M86, N10-N12, N13.6, N16.0, N30, N34, N39.0, R57.2 |
| Allergy                            | D69.0, H10.1, H10.4, J30.1-J30.4, J45.0, J67, L20, L23, L50.0, T78.0, T78.2-T78.4, T80.5, T88.6, T88.7, Z88, Z91.0                                                                                                           |
| Cancer                             | Published in <a href="#">Steliarova-Foucher et al. (2005)</a>                                                                                                                                                                |
| Respiratory                        | B97.4, J00-J06, J09-J22, J12-J18, J40-J47, J69.0                                                                                                                                                                             |
| Cardiovascular                     | I05-I15, I26-I28, I34-I39, I42-I45, I47-I50, I60-I61, I63-I64, G45                                                                                                                                                           |
| Metabolic                          | E10, E11, E66, E78, E88.80                                                                                                                                                                                                   |
| Gastrointestinal                   | K20-K31, K35, K42, K50-K52, K71, K72, K85, R10                                                                                                                                                                               |
| Urinary                            | N10-N12, N13.6, N16.0, N17-N19, N30, N34, N39.0                                                                                                                                                                              |
| Genital                            | N43                                                                                                                                                                                                                          |
| Musculoskeletal                    | M05-M09, M30-M36, M41                                                                                                                                                                                                        |
| Central nervous system             | G03, G08-G99, R56.88                                                                                                                                                                                                         |
| Ophthalmologic                     | E00-E89                                                                                                                                                                                                                      |
| Otologic                           | H65-H67, H92                                                                                                                                                                                                                 |
| Mental and behavioral <sup>a</sup> | F70-F98                                                                                                                                                                                                                      |

<sup>a</sup>Cognitive, behavioral, speech and language and other developmental disorders.
