# Supplementary material
Source: PubMed Central journal article supplement (PMC9433838)
Supplement: deac154_supplementary_table_sii.pdf [file deac154_supplementary_table_sii.pdf]

**Supplementary Table SII Childhood hospitalization rates according to maternal characteristics.**

|                                     | No. children | No. children hospitalized | Incidence rate per 1000 person-years (95% CI) | Cumulative incidence per 100 children at 13 years (95% CI) |
|-------------------------------------|--------------|---------------------------|-----------------------------------------------|------------------------------------------------------------|
| Polycystic ovary syndrome           |              |                           |                                               |                                                            |
| Yes                                 | 7160         | 2314                      | 68.9 (66.2–71.8)                              | 39.0 (37.5–40.5)                                           |
| No                                  | 1 031 215    | 273 040                   | 45.3 (45.1–45.5)                              | 31.8 (31.7–32.0)                                           |
| Maternal age, years                 |              |                           |                                               |                                                            |
| <30                                 | 500 030      | 144 899                   | 49.2 (48.9–49.4)                              | 34.3 (34.1–34.4)                                           |
| 30–34                               | 350 653      | 89 203                    | 43.7 (43.4–44.0)                              | 30.7 (30.4–30.9)                                           |
| ≥35                                 | 187 692      | 41 252                    | 38.4 (38.1–38.8)                              | 27.5 (27.2–27.9)                                           |
| Parity                              |              |                           |                                               |                                                            |
| 0                                   | 509 575      | 125 721                   | 41.2 (41.0–41.4)                              | 30.3 (30.1–30.5)                                           |
| 1                                   | 360 220      | 102 473                   | 49.7 (49.4–50.0)                              | 33.4 (33.2–33.7)                                           |
| ≥2                                  | 168 580      | 47 160                    | 49.9 (49.4–50.3)                              | 33.4 (33.0–33.7)                                           |
| ART                                 |              |                           |                                               |                                                            |
| Yes                                 | 19 474       | 4921                      | 59.0 (57.4–60.7)                              | 31.0 (30.0–31.9)                                           |
| No                                  | 789 296      | 197 365                   | 51.3 (51.1–51.5)                              | 30.0 (29.8–30.1)                                           |
| Missing                             | 229 605      | 73 068                    | 34.3 (34.1–34.6)                              | 32.7 (32.5–33.0)                                           |
| Maternal comorbidity <sup>a</sup>   |              |                           |                                               |                                                            |
| Yes                                 | 87 945       | 26 654                    | 223.4 (221.9–224.9)                           | 38.2 (37.7–38.8)                                           |
| No                                  | 950 430      | 248 700                   | 167.7 (167.4–168.1)                           | 31.4 (31.2–31.5)                                           |
| Substance use disorder <sup>b</sup> |              |                           |                                               |                                                            |
| Yes                                 | 20 219       | 6 152                     | 64.0 (62.4–65.6)                              | 38.0 (36.8–39.1)                                           |
| No                                  | 1 018 156    | 269 202                   | 45.1 (45.0–45.3)                              | 31.8 (31.6–31.9)                                           |
| Socioeconomic deprivation           |              |                           |                                               |                                                            |
| Yes                                 | 208 342      | 55 991                    | 47.1 (46.7–47.4)                              | 32.8 (32.5–33.2)                                           |
| No                                  | 830 033      | 219 363                   | 45.0 (44.9–45.2)                              | 31.6 (31.5–31.8)                                           |
| Year of birth                       |              |                           |                                               |                                                            |
| 2006–2010                           | 388 904      | 120 034                   | 35.4 (35.2–35.6)                              | 32.1 (31.9–32.3)                                           |
| 2011–2015                           | 406 055      | 109 180                   | 51.2 (50.9–51.5)                              | 28.9 (28.7–29.0)                                           |
| 2016–2019                           | 243 416      | 46 140                    | 86.3 (85.6–87.1)                              | 23.2 (23.0–23.4)                                           |
| Total                               | 1 038 375    | 275 354                   | 45.4 (45.3–45.6)                              | 31.9 (31.7–32.0)                                           |

<sup>a</sup>Hypertension, type 1 and 2 diabetes, obesity, dyslipidemia, mental disorders, allergy and asthma.

<sup>b</sup>Tobacco, alcohol and drug use disorders.
