# Supplementary material
Source: PubMed Central journal article supplement (PMC9433838)
Supplement: deac154_supplementary_table_siii.pdf [file deac154_supplementary_table_siii.pdf]

**Supplementary Table SIII Association of maternal polycystic ovary syndrome with specific child morbidities.**

|                                  | Hospitalization rate per<br>1000 person-years (95% CI) |                  | Hazard ratio (95% CI) |                       |
|----------------------------------|--------------------------------------------------------|------------------|-----------------------|-----------------------|
|                                  | PCOS                                                   | No PCOS          | Unadjusted            | Adjusted <sup>a</sup> |
| <b>Infection</b>                 |                                                        |                  |                       |                       |
| Pneumonia                        | 8.1 (7.3–9.0)                                          | 5.8 (5.7–5.9)    | 1.19 (1.07–1.32)      | 1.21 (1.08–1.34)      |
| Bronchitis                       | 0.5 (0.4–0.8)                                          | 0.5 (0.5–0.5)    | 0.86 (0.57–1.30)      | 0.88 (0.64–1.47)      |
| Otitis media                     | 30.8 (29.0–32.6)                                       | 19.3 (19.2–19.4) | 1.31 (1.23–1.38)      | 1.30 (1.22–1.38)      |
| Ophthalmitis                     | 1.1 (0.9–1.5)                                          | 0.8 (0.7–0.8)    | 1.26 (0.96–1.66)      | 1.29 (0.98–1.69)      |
| Meningitis                       | 0.5 (0.3–0.8)                                          | 0.4 (0.3–0.4)    | 1.20 (0.80–1.81)      | 1.21 (0.80–1.83)      |
| Gastroenteritis                  | 5.2 (4.6–5.9)                                          | 3.3 (3.3–3.4)    | 1.34 (1.17–1.52)      | 1.43 (1.25–1.64)      |
| Nephritis                        | 3.6 (3.1–4.2)                                          | 2.3 (2.2–2.3)    | 1.38 (1.18–1.61)      | 1.41 (1.21–1.65)      |
| Septicemia                       | 0.5 (0.3–0.8)                                          | 0.3 (0.3–0.3)    | 1.49 (0.99–2.25)      | 1.40 (0.93–2.11)      |
| <b>Allergy</b>                   |                                                        |                  |                       |                       |
| Asthma                           | 5.5 (4.9–6.3)                                          | 3.1 (3.0–3.1)    | 1.53 (1.35–1.73)      | 1.54 (1.36–1.76)      |
| <b>Cancer</b>                    |                                                        |                  |                       |                       |
| Blood cancer                     | 0.1 (0.0–0.2)                                          | 0.1 (0.1–0.1)    | 1.00 (0.37–2.66)      | 1.11 (0.42–2.95)      |
| <b>Other</b>                     |                                                        |                  |                       |                       |
| Hypertension                     | 0.4 (0.3–0.7)                                          | 0.3 (0.2–0.3)    | 1.51 (0.97–2.34)      | 1.37 (0.88–2.13)      |
| Arrhythmia                       | 0.3 (0.2–0.3)                                          | 0.2 (0.2–0.2)    | 1.19 (0.71–2.02)      | 1.00 (0.59–1.69)      |
| Heart failure                    | 0.2 (0.1–0.4)                                          | 0.1 (0.1–0.1)    | 1.82 (0.94–3.50)      | 1.46 (0.75–2.82)      |
| Heart valve disorder             | 0.2 (0.1–0.4)                                          | 0.1 (0.1–0.1)    | 1.39 (0.72–2.68)      | 1.18 (0.61–2.27)      |
| Cardiomyopathy                   | 0.2 (0.1–0.3)                                          | 0.1 (0.1–0.1)    | 1.56 (0.78–3.13)      | 1.08 (0.54–2.16)      |
| Pulmonary                        | 0.1 (0.0–0.2)                                          | 0.1 (0.1–0.1)    | 0.67 (0.25–1.79)      | 0.79 (0.30–2.13)      |
| Stroke                           | 0.8 (0.6–1.1)                                          | 0.4 (0.4–0.4)    | 1.68 (1.21–2.33)      | 1.61 (1.16–2.24)      |
| Type I diabetes                  | 0.2 (0.1–0.4)                                          | 0.1 (0.1–0.1)    | 2.02 (1.05–3.89)      | 1.55 (0.80–3.01)      |
| Metabolic syndrome               | 1.0 (0.8–1.3)                                          | 0.5 (0.5–0.5)    | 1.71 (1.27–2.30)      | 1.71 (1.27–2.30)      |
| Cerebral palsy                   | 1.3 (1.0–1.7)                                          | 1.0 (1.0–1.0)    | 1.18 (0.92–1.53)      | 1.23 (0.95–1.58)      |
| Epilepsy                         | 0.8 (0.6–1.1)                                          | 0.5 (0.5–0.5)    | 1.44 (1.05–1.98)      | 1.44 (1.05–1.99)      |
| Hydrocephalus                    | 0.5 (0.3–0.7)                                          | 0.1 (0.1–0.2)    | 2.83 (1.86–4.31)      | 1.85 (1.21–2.82)      |
| Eyelid/lacrimal/orbit            | 1.3 (1.0–1.6)                                          | 0.8 (0.7–0.8)    | 1.43 (1.11–1.85)      | 1.45 (1.12–1.87)      |
| Conjunctiva                      | 0.5 (0.4–0.8)                                          | 0.2 (0.2–0.2)    | 2.26 (1.51–3.37)      | 2.18 (1.46–3.27)      |
| Retina/choroid                   | 0.4 (0.3–0.7)                                          | 0.3 (0.2–0.3)    | 1.51 (0.97–2.34)      | 1.37 (0.88–2.13)      |
| Strabismus                       | 0.3 (0.2–0.3)                                          | 0.2 (0.2–0.2)    | 1.19 (0.71–2.02)      | 1.00 (0.59–1.69)      |
| Visual disturbance and blindness | 0.2 (0.1–0.4)                                          | 0.1 (0.1–0.1)    | 1.82 (0.94–3.50)      | 1.46 (0.75–2.82)      |

<sup>a</sup>Hazard ratio for PCOS relative to no PCOS, adjusted for maternal age, parity, ART, maternal comorbidity, substance use disorder, socioeconomic deprivation and year of birth.
