# Supplementary material
Source: PubMed Central journal article supplement (PMC9433838)
Supplement: deac154_supplementary_table_siv.pdf [file deac154_supplementary_table_siv.pdf]

**human reproduction** **SUPPLEMENTARY DATA**

**Supplementary Table SIV Sensitivity analyses for the association of maternal polycystic ovary syndrome with childhood hospitalization.**

|                         | Hazard ratio <sup>a</sup> (95% CI)                 |                                             |                                              |                                                 |                                           |
|-------------------------|----------------------------------------------------|---------------------------------------------|----------------------------------------------|-------------------------------------------------|-------------------------------------------|
|                         | Partially adjusted <sup>b</sup><br>(n = 1 038 375) | Excluding ART <sup>c</sup><br>(n = 793 294) | Excluding multiple births<br>(n = 1 017 791) | Excluding maternal comorbidity<br>(n = 950 430) | Excluding preterm births<br>(n = 968 189) |
| Type of hospitalization |                                                    |                                             |                                              |                                                 |                                           |
| Any                     | 1.38 (1.32–1.44)                                   | 1.32 (1.25–1.39)                            | 1.34 (1.28–1.41)                             | 1.39 (1.32–1.47)                                | 1.34 (1.28–1.41)                          |
| Infection               | 1.37 (1.30–1.44)                                   | 1.30 (1.23–1.38)                            | 1.34 (1.27–1.40)                             | 1.40 (1.32–1.48)                                | 1.34 (1.27–1.41)                          |
| Allergy                 | 1.58 (1.41–1.78)                                   | 1.48 (1.28–1.71)                            | 1.52 (1.34–1.71)                             | 1.51 (1.31–1.74)                                | 1.44 (1.26–1.65)                          |
| Cancer                  | 1.20 (0.68–2.10)                                   | 0.72 (0.30–1.73)                            | 1.10 (0.61–1.99)                             | 1.14 (0.59–2.19)                                | 1.20 (0.66–2.17)                          |
| Physiologic system      |                                                    |                                             |                                              |                                                 |                                           |
| Respiratory             | 1.38 (1.29–1.48)                                   | 1.31 (1.22–1.42)                            | 1.34 (1.25–1.43)                             | 1.39 (1.29–1.50)                                | 1.32 (1.23–1.42)                          |
| Cardiovascular          | 1.39 (1.04–1.85)                                   | 1.33 (0.95–1.87)                            | 1.39 (1.04–1.85)                             | 1.40 (0.99–1.96)                                | 1.17 (0.83–1.66)                          |
| Metabolic               | 1.73 (1.26–2.36)                                   | 1.65 (1.13–2.42)                            | 1.69 (1.24–2.31)                             | 1.51 (1.03–2.22)                                | 1.52 (1.07–2.16)                          |
| Gastrointestinal        | 1.82 (1.62–2.04)                                   | 1.72 (1.50–1.98)                            | 1.75 (1.56–1.96)                             | 1.78 (1.56–2.03)                                | 1.70 (1.49–1.93)                          |
| Urinary                 | 1.49 (1.28–1.74)                                   | 1.48 (1.24–1.77)                            | 1.40 (1.20–1.64)                             | 1.48 (1.24–1.76)                                | 1.44 (1.22–1.70)                          |
| Genital                 | 1.39 (1.01–1.92)                                   | 1.52 (1.03–2.23)                            | 1.49 (1.08–2.06)                             | 1.08 (0.71–1.64)                                | 1.59 (1.13–2.24)                          |
| Musculoskeletal         | 0.86 (0.48–1.56)                                   | 0.83 (0.40–1.74)                            | 0.80 (0.43–1.50)                             | 0.81 (0.41–1.63)                                | 0.97 (0.54–1.76)                          |
| Central nervous system  | 1.82 (1.53–2.17)                                   | 1.88 (1.54–2.29)                            | 1.79 (1.50–2.14)                             | 1.69 (1.37–2.09)                                | 1.73 (1.42–2.10)                          |
| Ophthalmologic          | 1.52 (1.32–1.73)                                   | 1.44 (1.22–1.70)                            | 1.47 (1.28–1.69)                             | 1.50 (1.29–1.76)                                | 1.39 (1.19–1.62)                          |
| Otologic                | 1.39 (1.31–1.49)                                   | 1.31 (1.21–1.42)                            | 1.38 (1.29–1.48)                             | 1.40 (1.30–1.51)                                | 1.37 (1.28–1.47)                          |
| Mental and behavioral   | 1.86 (1.57–2.20)                                   | 1.63 (1.31–2.02)                            | 1.74 (1.46–2.06)                             | 1.92 (1.58–2.33)                                | 1.66 (1.37–2.02)                          |

<sup>a</sup>Hazard ratio for PCOS relative to no PCOS, adjusted for maternal age, parity, ART, maternal comorbidity, substance use disorder, socioeconomic deprivation and year of birth.

<sup>b</sup>Adjusted for all covariates except maternal comorbidity.

<sup>c</sup>Data for 2008 to 2019.

PCOS, polycystic ovary syndrome.
