# Supplementary material
Source: PubMed Central journal article supplement (PMC9433838)
Supplement: deac154_supplementary_table_sv.pdf [file deac154_supplementary_table_sv.pdf]

**Supplementary Table SV E-values for residual confounding of the association between maternal polycystic ovary syndrome and childhood hospitalization.**

|                         | Hazard ratio <sup>a</sup> (95% CI) | E-value |
|-------------------------|------------------------------------|---------|
| Type of hospitalization |                                    |         |
| Any                     | 1.32 (1.26–1.40)                   | 1.97    |
| Infection               | 1.31 (1.25–1.38)                   | 1.95    |
| Allergy                 | 1.47 (1.31–1.66)                   | 2.30    |
| Cancer                  | 1.17 (0.67–2.05)                   | 1.62    |
| Physiologic system      |                                    |         |
| Respiratory             | 1.32 (1.23–1.41)                   | 1.97    |
| Cardiovascular          | 1.31 (0.99–1.74)                   | 1.95    |
| Metabolic               | 1.59 (1.16–2.18)                   | 2.56    |
| Gastrointestinal        | 1.72 (1.53–1.92)                   | 2.83    |
| Urinary                 | 1.43 (1.23–1.66)                   | 2.21    |
| Genital                 | 1.36 (0.99–1.87)                   | 2.06    |
| Musculoskeletal         | 0.85 (0.47–1.53)                   | 1.63    |
| Central nervous system  | 1.74 (1.46–2.07)                   | 2.87    |
| Ophthalmologic          | 1.46 (1.27–1.67)                   | 2.28    |
| Otologic                | 1.34 (1.26–1.43)                   | 2.01    |
| Mental and behavioral   | 1.68 (1.42–1.99)                   | 2.75    |

<sup>a</sup>Hazard ratio for PCOS relative to no PCOS, adjusted for maternal age, parity, ART, maternal comorbidity, substance use disorder, socioeconomic deprivation and year of birth.
